# Supplementary material for: New main-group ferrocenyldithiocarbamates and conversion to ferrocene oxazolidine-2-thione and -2-one
Source: Royal Society of Chemistry journal article supplement (doi:10.1039/c9nj06139h), 2020-01-01

## **New main group ferrocenyldithiocarbamates and conversion to ferrocene oxazolidine-2-thione and -2-one**

Reena Yadav,<sup>a</sup> Suryabhan Singh,<sup>b</sup> Manoj Trivedi,<sup>c</sup> Gabriele Kociok-Köhn,<sup>d</sup> Nigam P. Rath,<sup>e</sup> Randolph D. Köhn,<sup>f\*</sup> Mohd. Muddassir,<sup>g</sup> and Abhinav Kumar<sup>a\*</sup>

- 
- <sup>a.</sup> *Department of Chemistry, University of Lucknow, Lucknow 226 007, India.  
Email: [abhinavmarshal@gmail.com](mailto:abhinavmarshal@gmail.com)*
- <sup>b.</sup> *Department of Chemistry, Guru Ghasidas Vishwadiyalaya, Bilaspur India*
- <sup>c.</sup> *Department of Chemistry, University of Delhi, Delhi 110 007, India.*
- <sup>d.</sup> *Material and Chemical Characterisation Facility (MC<sup>2</sup>), University of Bath, Bath BA2 7AY, UK*
- <sup>e.</sup> *Department of Chemistry & Biochemistry and Centre for Nanoscience, University of Missouri-St. Louis, One University Boulevard, St. Louis, MO 63121-4499, USA*
- <sup>f.</sup> *Department of Chemistry, University of Bath, Bath BA2 7AY, UK Email: [chsrdk@bath.ac.uk](mailto:chsrdk@bath.ac.uk)*

## ESI-MS results related to the Comproportionation reactions of Copper Complex

Copper complex in MeCN:

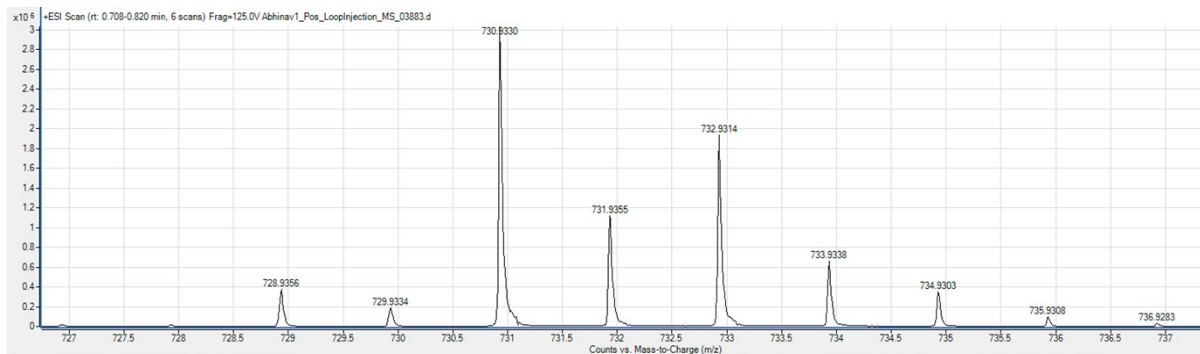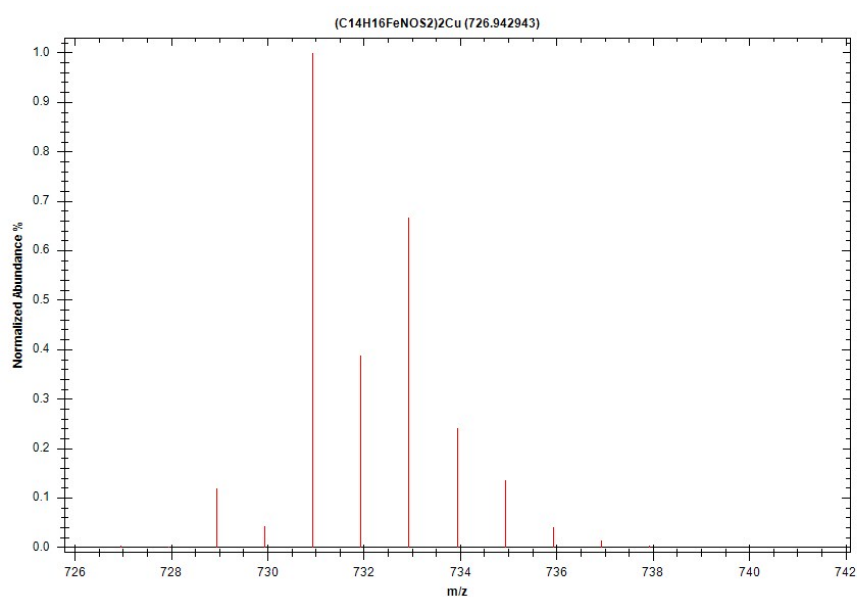

| m/z      | Abund<br>(% largest) | Abund<br>(% sum) | Abund<br>(% first) |
|----------|----------------------|------------------|--------------------|
| 726.9429 | 0.37                 | 0.14             | 100                |
| 727.9458 | 0.13                 | 0.05             | 34.62              |
| 728.9383 | 11.95                | 4.49             | 3208.31            |
| 729.9411 | 4.4                  | 1.66             | 1181.61            |
| 730.9338 | 100                  | 37.61            | 26848.16           |
| 731.9364 | 38.83                | 14.6             | 10424.64           |
| 732.932  | 66.79                | 25.12            | 17933.14           |
| 733.9341 | 24.05                | 9.04             | 6455.66            |
| 734.9305 | 13.59                | 5.11             | 3648.55            |
| 735.9315 | 4.04                 | 1.52             | 1083.67            |
| 736.929  | 1.34                 | 0.5              | 358.49             |
| 737.9291 | 0.32                 | 0.12             | 86.11              |
| 738.9276 | 0.07                 | 0.03             | 19.89              |
| 739.9273 | 0.01                 | 0.01             | 3.82               |
| 740.9266 | 0                    | 0                | 0.67               |

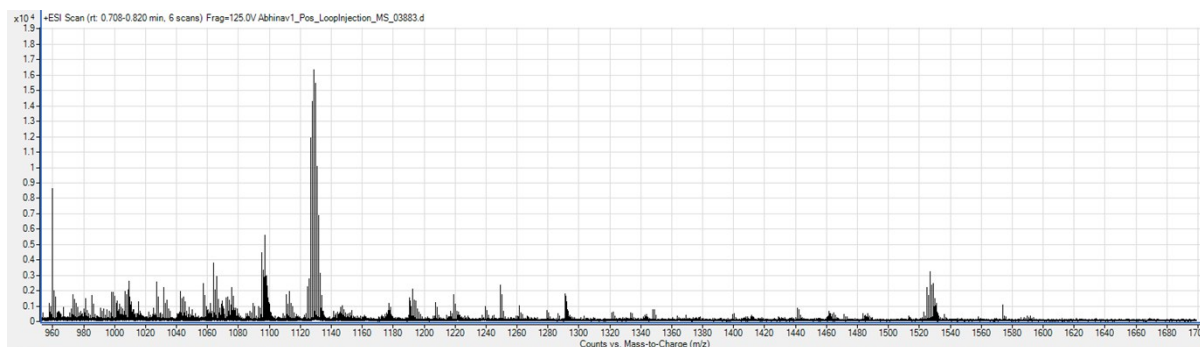

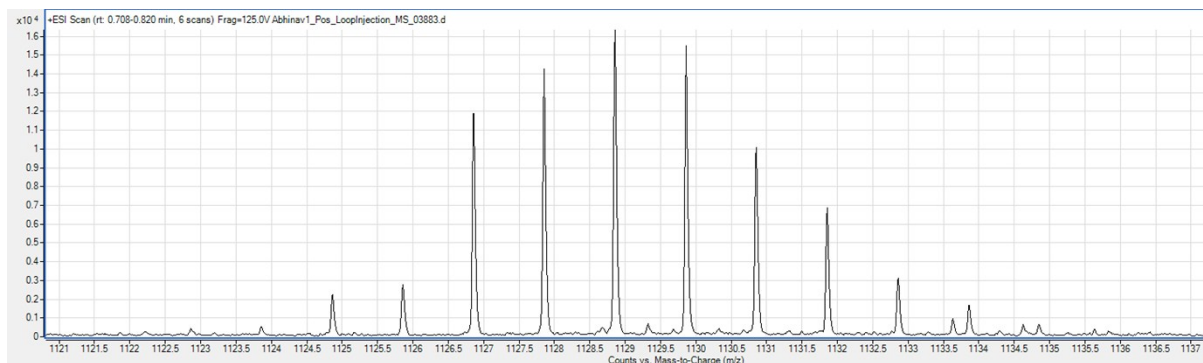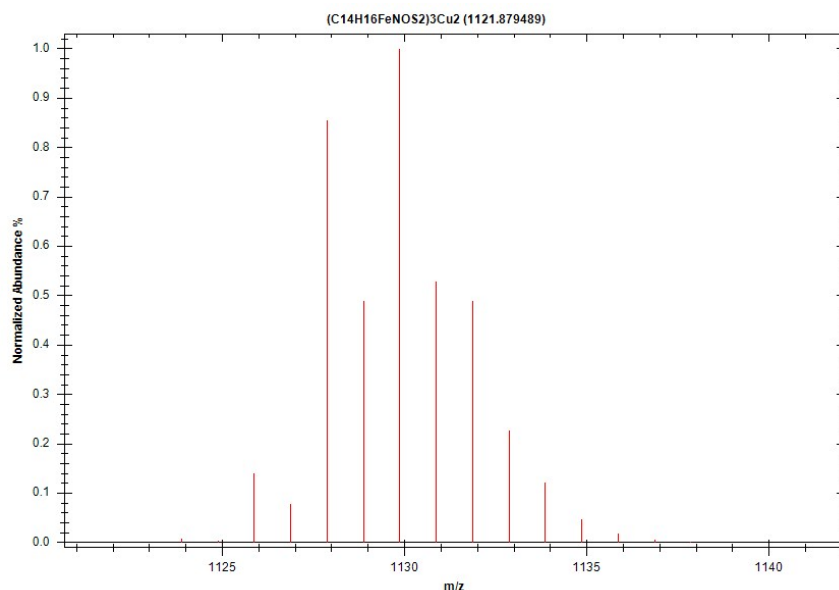

| m/z       | Abund<br>(% largest) | Abund<br>(% sum) | Abund<br>(% first) |
|-----------|----------------------|------------------|--------------------|
| 1121.8795 | 0.02                 | 0                | 100                |
| 1122.8824 | 0.01                 | 0                | 51.93              |
| 1123.8749 | 0.85                 | 0.21             | 4839.26            |
| 1124.8777 | 0.46                 | 0.11             | 2616.7             |
| 1125.8704 | 14.04                | 3.5              | 80178.61           |
| 1126.873  | 7.87                 | 1.96             | 44924.42           |
| 1127.8662 | 85.52                | 21.28            | 488210.19          |
| 1128.8686 | 49.05                | 12.21            | 279986.22          |
| 1129.8644 | 100                  | 24.89            | 570875.88          |
| 1130.8663 | 52.9                 | 13.17            | 301982.25          |
| 1131.863  | 48.93                | 12.18            | 279331.56          |
| 1132.8641 | 22.62                | 5.63             | 129146.11          |
| 1133.8617 | 12.26                | 3.05             | 70015.62           |
| 1134.8619 | 4.68                 | 1.17             | 26725.78           |
| 1135.8601 | 1.79                 | 0.45             | 10231.21           |
| 1136.8598 | 0.56                 | 0.14             | 3210.28            |
| 1137.8585 | 0.17                 | 0.04             | 951.79             |
| 1138.8579 | 0.04                 | 0.01             | 247.61             |
| 1139.8569 | 0.01                 | 0                | 59.62              |
| 1140.8563 | 0                    | 0                | 12.99              |

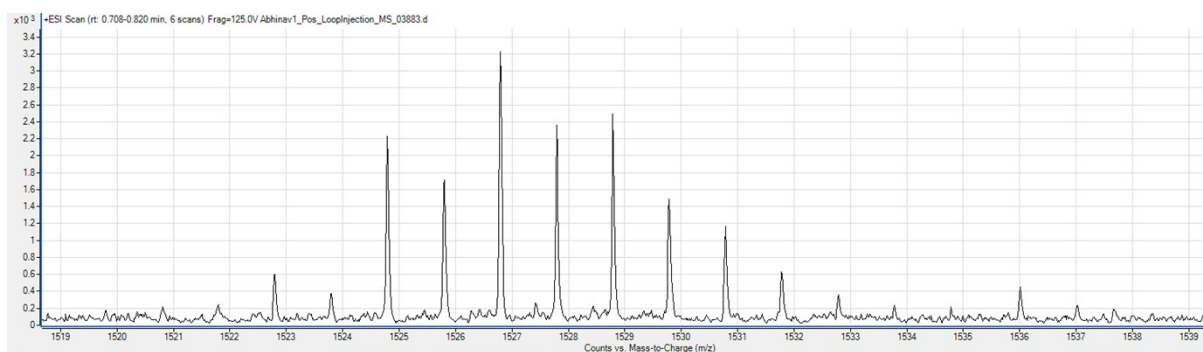

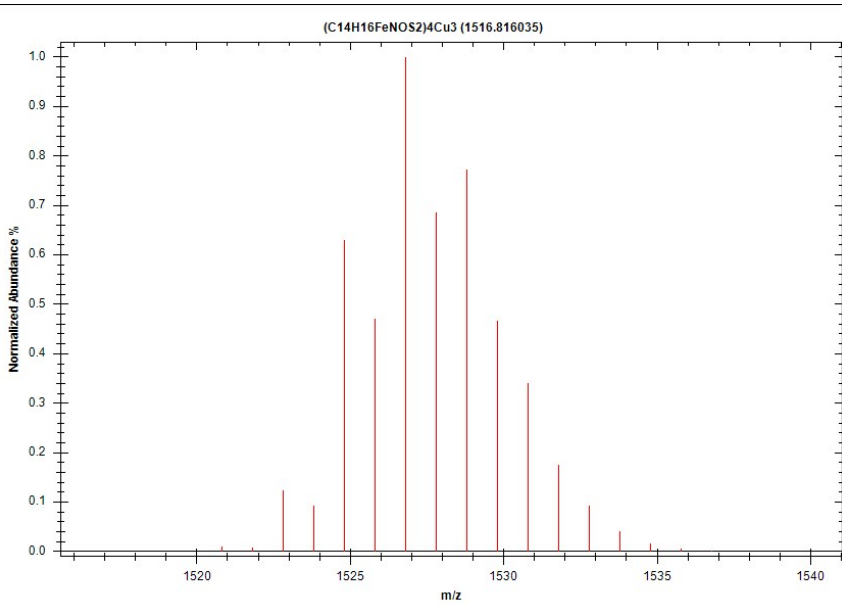

| m/z       | Abund<br>(% largest) | Abund<br>(% sum) | Abund<br>(% first) |
|-----------|----------------------|------------------|--------------------|
| 1516.816  | 0                    | 0                | 100                |
| 1517.8189 | 0                    | 0                | 69.23              |
| 1518.8115 | 0.04                 | 0.01             | 6473.21            |
| 1519.8143 | 0.03                 | 0.01             | 4615.35            |
| 1520.807  | 1.07                 | 0.22             | 160314.77          |
| 1521.8096 | 0.78                 | 0.16             | 117301.93          |
| 1522.8026 | 12.38                | 2.51             | 1850030.75         |
| 1523.8051 | 9.23                 | 1.87             | 1380136            |
| 1524.7987 | 62.96                | 12.77            | 9411082            |
| 1525.8009 | 47.05                | 9.54             | 7033158.5          |
| 1526.7968 | 100                  | 20.28            | 14948656           |
| 1527.7985 | 68.47                | 13.89            | 10234820           |
| 1528.7954 | 77.09                | 15.64            | 11523770           |
| 1529.7965 | 46.53                | 9.44             | 6956241            |
| 1530.7941 | 33.97                | 6.89             | 5078094.5          |
| 1531.7944 | 17.52                | 3.55             | 2619646.25         |
| 1532.7927 | 9.29                 | 1.88             | 1388273            |
| 1533.7925 | 4.02                 | 0.81             | 600322.44          |
| 1534.7911 | 1.67                 | 0.34             | 249319.91          |
| 1535.7905 | 0.61                 | 0.12             | 90669.25           |
| 1536.7894 | 0.21                 | 0.04             | 30933.37           |
| 1537.7886 | 0.06                 | 0.01             | 9567.39            |
| 1538.7877 | 0.02                 | 0                | 2759.85            |
| 1539.7869 | 0                    | 0                | 734.51             |

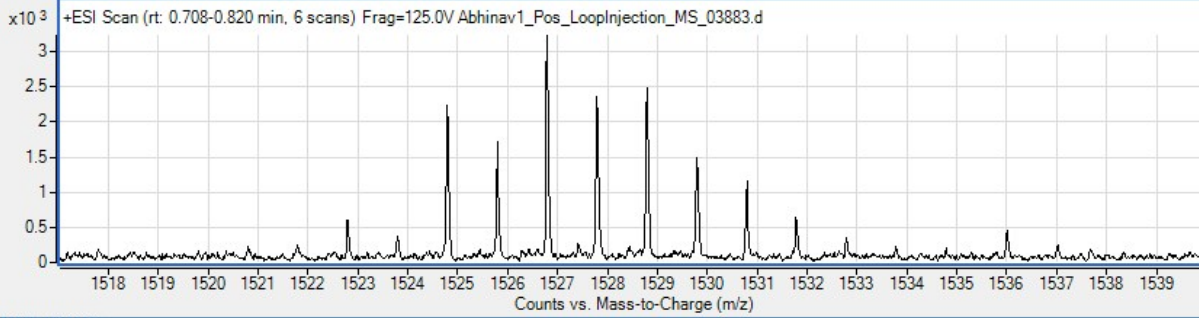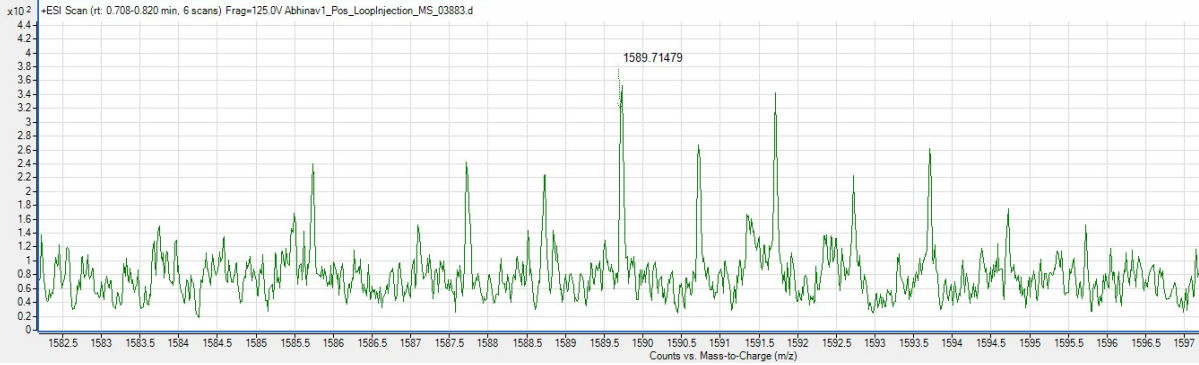

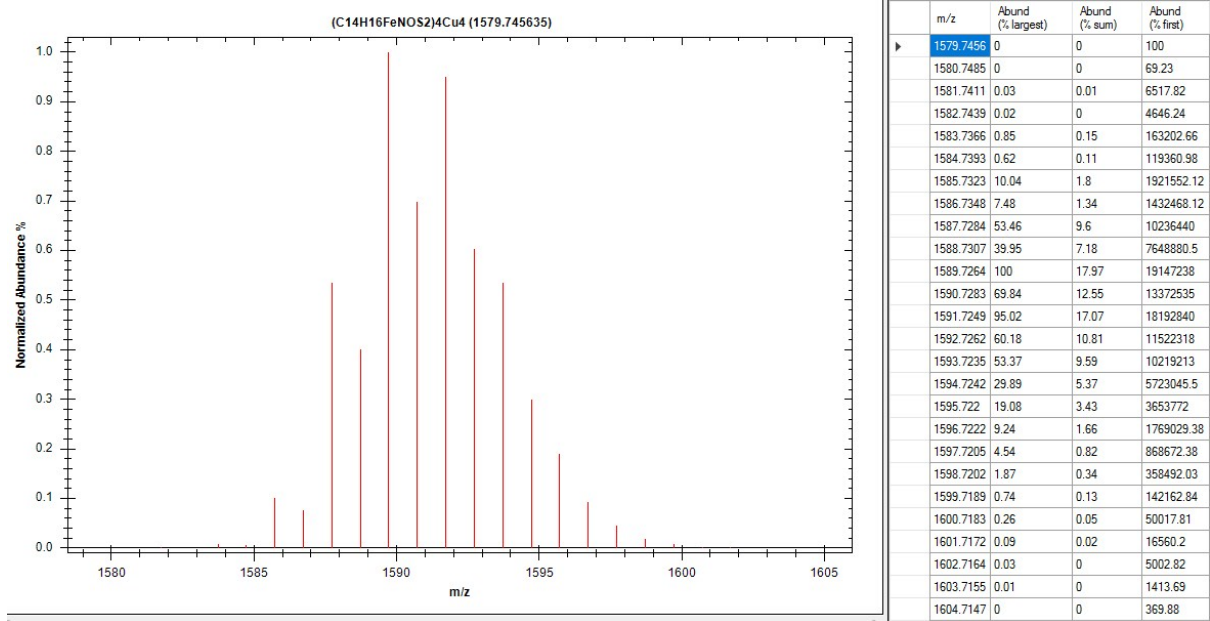

After 1d with Cu powder in DCM, drop of filtered solution into MeCN

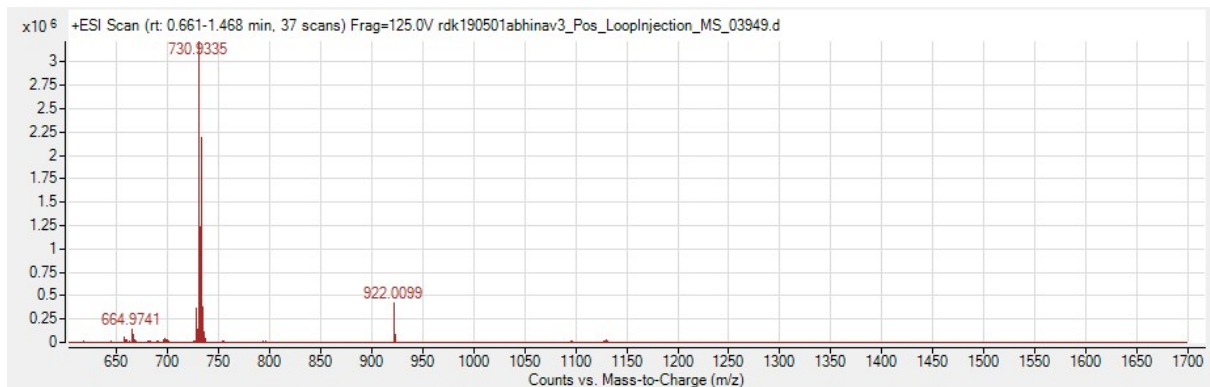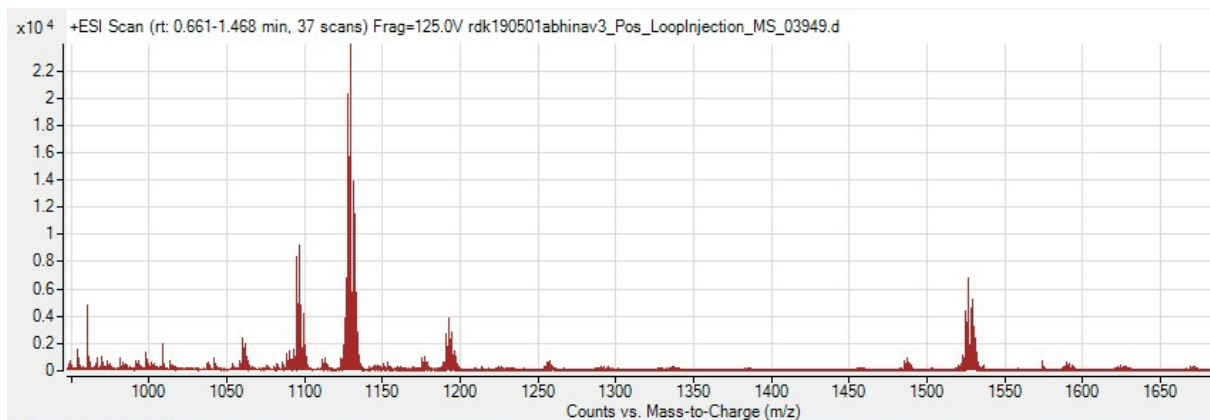

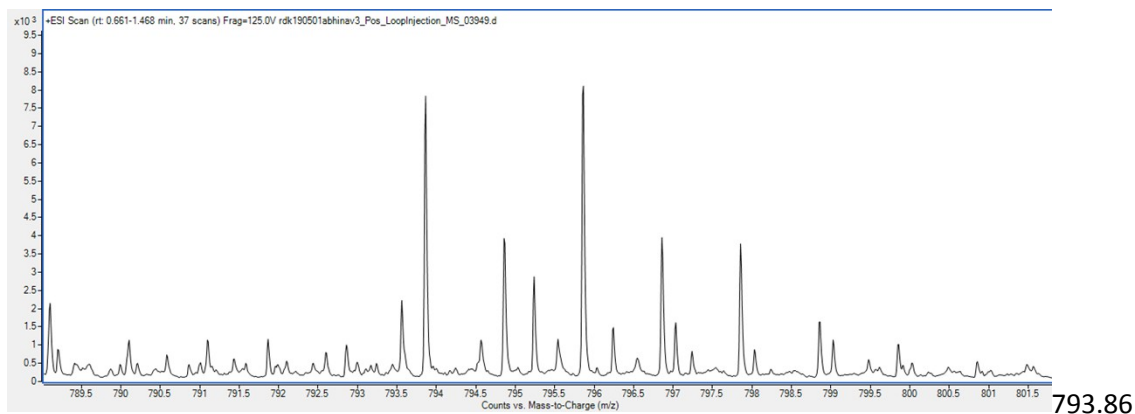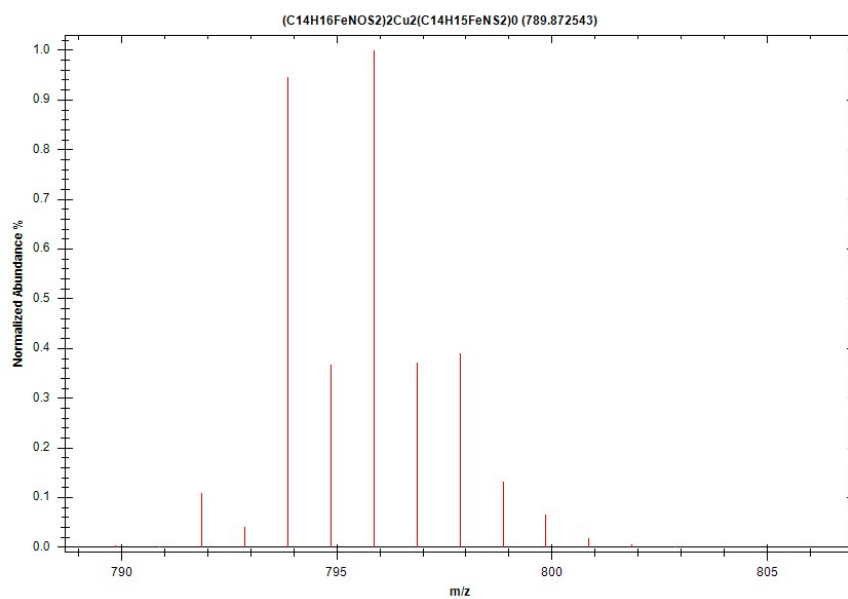

| m/z      | Abund<br>(% largest) | Abund<br>(% sum) | Abund<br>(% first) |
|----------|----------------------|------------------|--------------------|
| 789.8725 | 0.33                 | 0.1              | 100                |
| 790.8754 | 0.12                 | 0.03             | 34.62              |
| 791.868  | 10.88                | 3.15             | 3252.92            |
| 792.8707 | 4                    | 1.16             | 1197.05            |
| 793.8636 | 94.55                | 27.39            | 28279.49           |
| 794.8661 | 36.61                | 10.61            | 10951.79           |
| 795.8616 | 100                  | 28.97            | 29910.96           |
| 796.8639 | 37.13                | 10.76            | 11106.42           |
| 797.8599 | 38.95                | 11.28            | 11649.09           |
| 798.8617 | 13.25                | 3.84             | 3963.75            |
| 799.8584 | 6.64                 | 1.92             | 1986.23            |
| 800.8592 | 1.9                  | 0.55             | 569.57             |
| 801.8568 | 0.6                  | 0.17             | 179.83             |
| 802.8569 | 0.14                 | 0.04             | 42.24              |
| 803.8555 | 0.03                 | 0.01             | 9.54               |
| 804.8552 | 0.01                 | 0                | 1.81               |
| 805.8544 | 0                    | 0                | 0.31               |

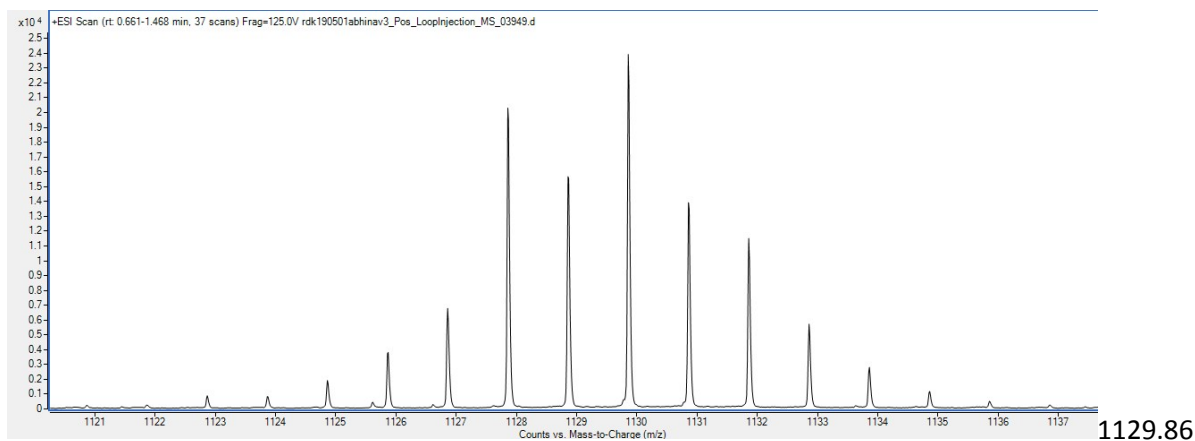

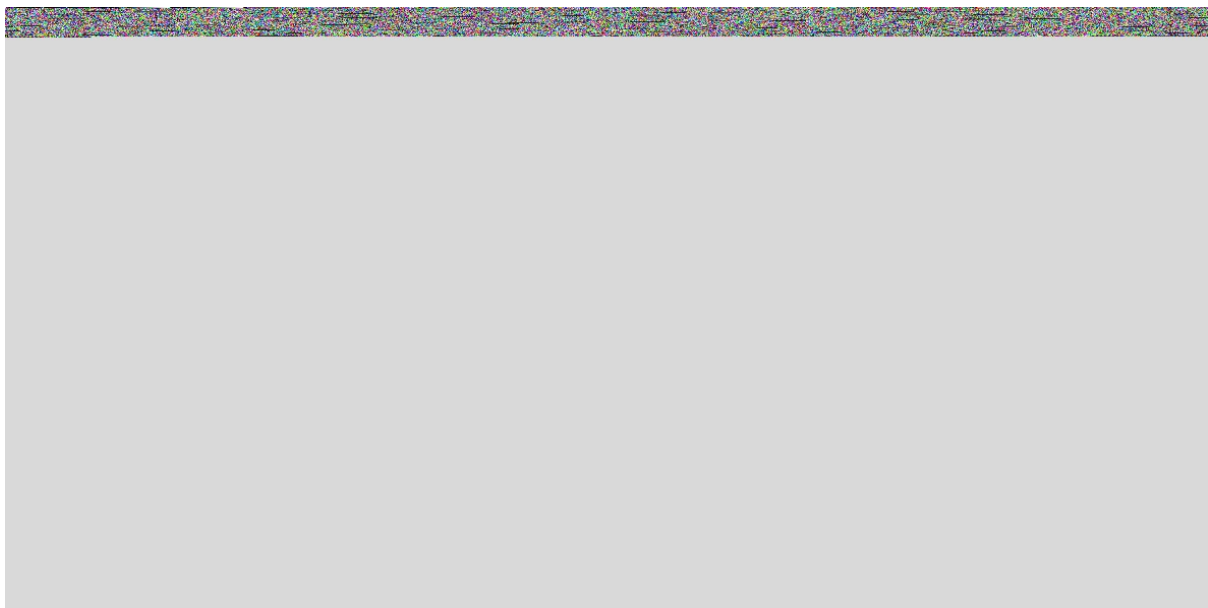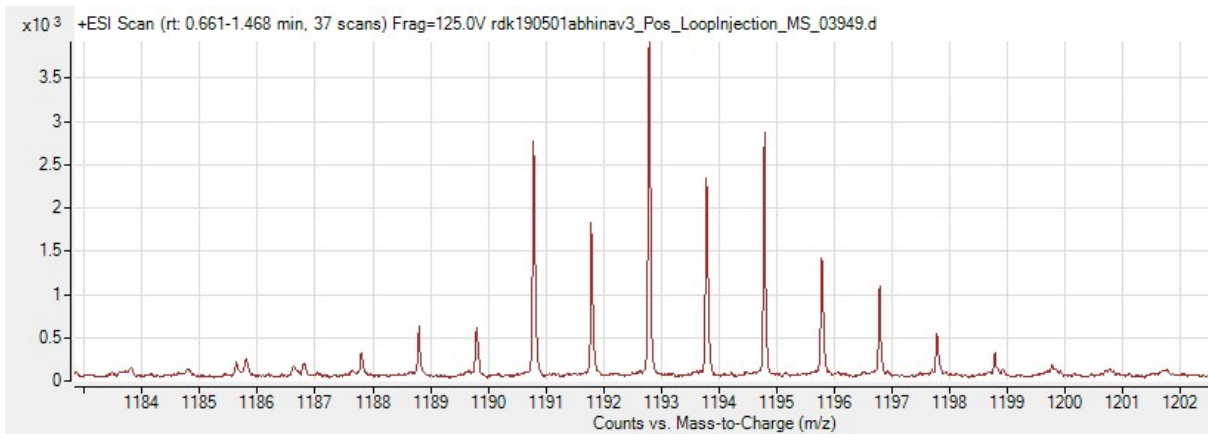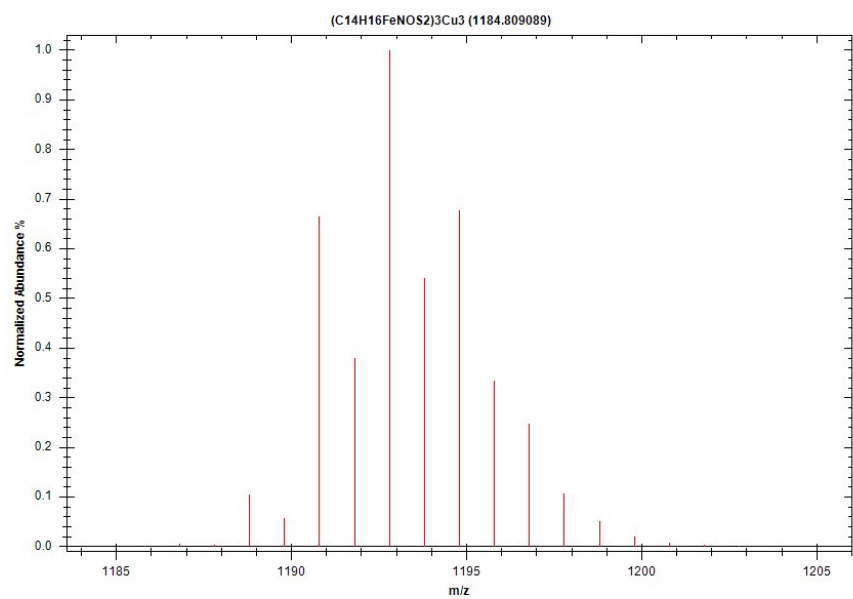

| m/z       | Abund<br>(% largest) | Abund<br>(% sum) | Abund<br>(% first) |
|-----------|----------------------|------------------|--------------------|
| 1184.8091 | 0.01                 | 0                | 100                |
| 1185.812  | 0.01                 | 0                | 51.93              |
| 1186.8045 | 0.62                 | 0.15             | 4883.87            |
| 1187.8073 | 0.33                 | 0.08             | 2639.87            |
| 1188.8001 | 10.44                | 2.48             | 82337.55           |
| 1189.8027 | 5.84                 | 1.39             | 46091.82           |
| 1190.7959 | 66.44                | 15.8             | 523980.47          |
| 1191.7984 | 38.04                | 9.05             | 300028.44          |
| 1192.794  | 100                  | 23.78            | 788681.88          |
| 1193.7961 | 54.13                | 12.87            | 426892.91          |
| 1194.7924 | 67.71                | 16.1             | 534017.31          |
| 1195.7939 | 33.46                | 7.96             | 263869.94          |
| 1196.791  | 24.68                | 5.87             | 194634.27          |
| 1197.7918 | 10.69                | 2.54             | 84341.94           |
| 1198.7895 | 5.26                 | 1.25             | 41467.39           |
| 1199.7896 | 1.92                 | 0.46             | 15133.49           |
| 1200.7879 | 0.7                  | 0.17             | 5516.25            |
| 1201.7876 | 0.21                 | 0.05             | 1679.82            |
| 1202.7863 | 0.06                 | 0.01             | 484.24             |
| 1203.7857 | 0.02                 | 0                | 123.45             |
| 1204.7847 | 0                    | 0                | 29.2               |

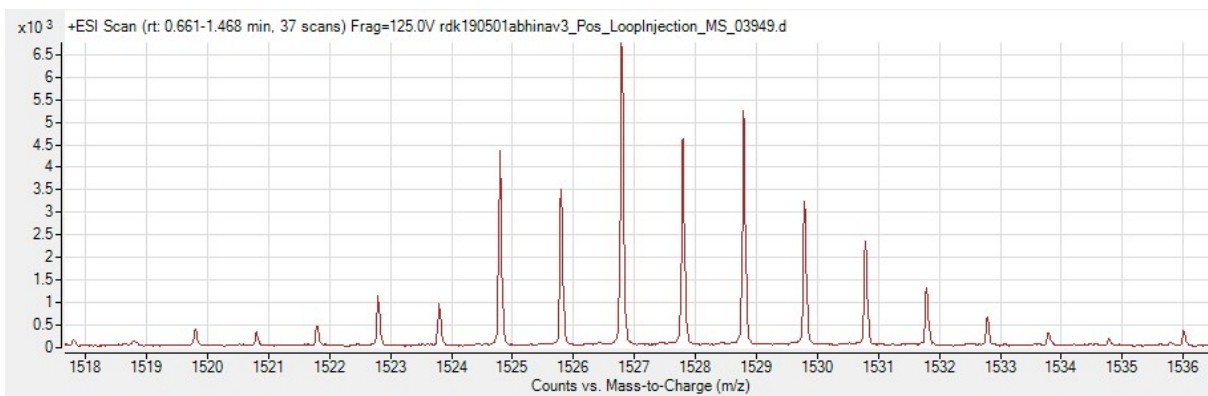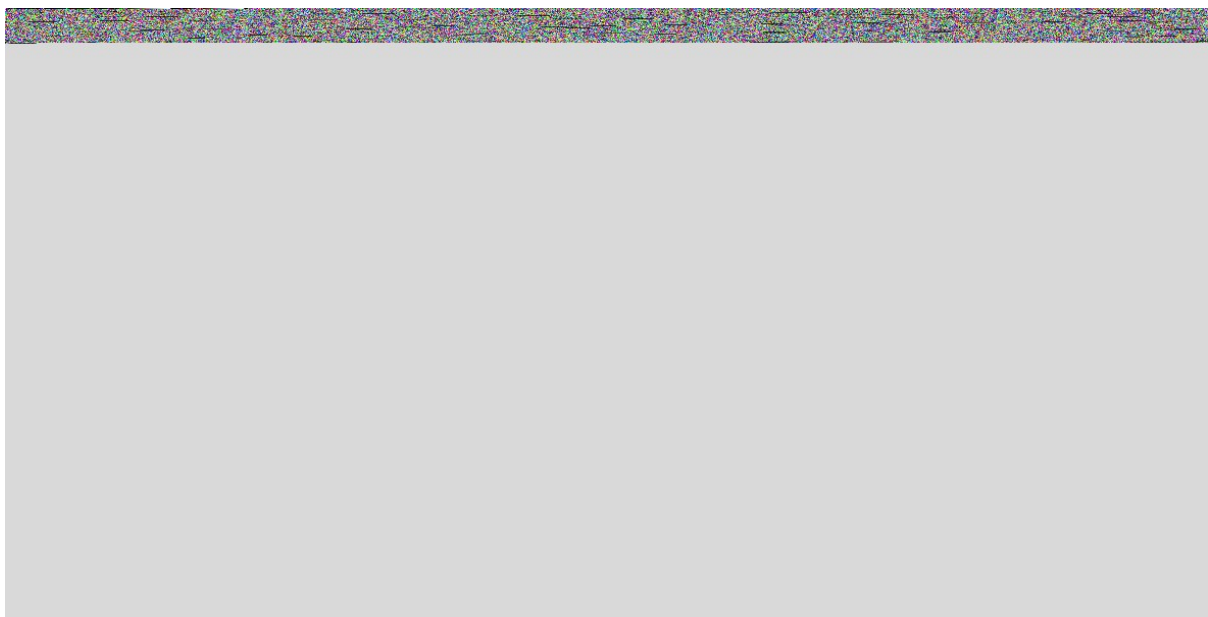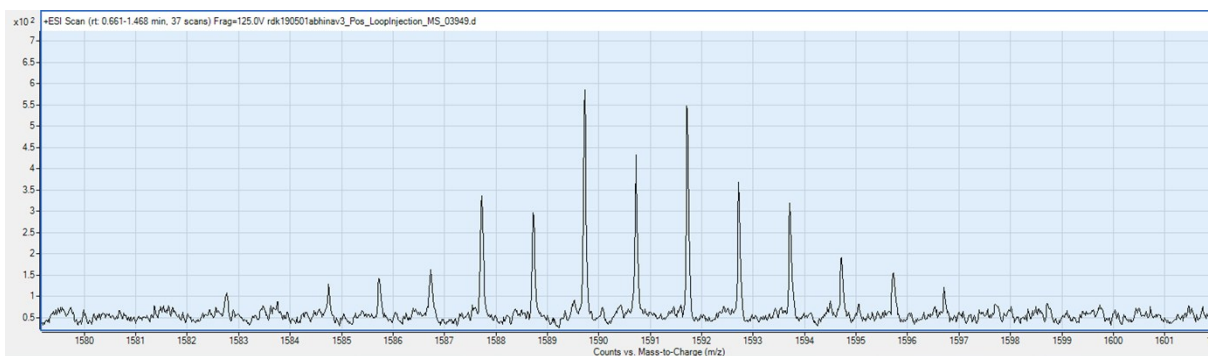

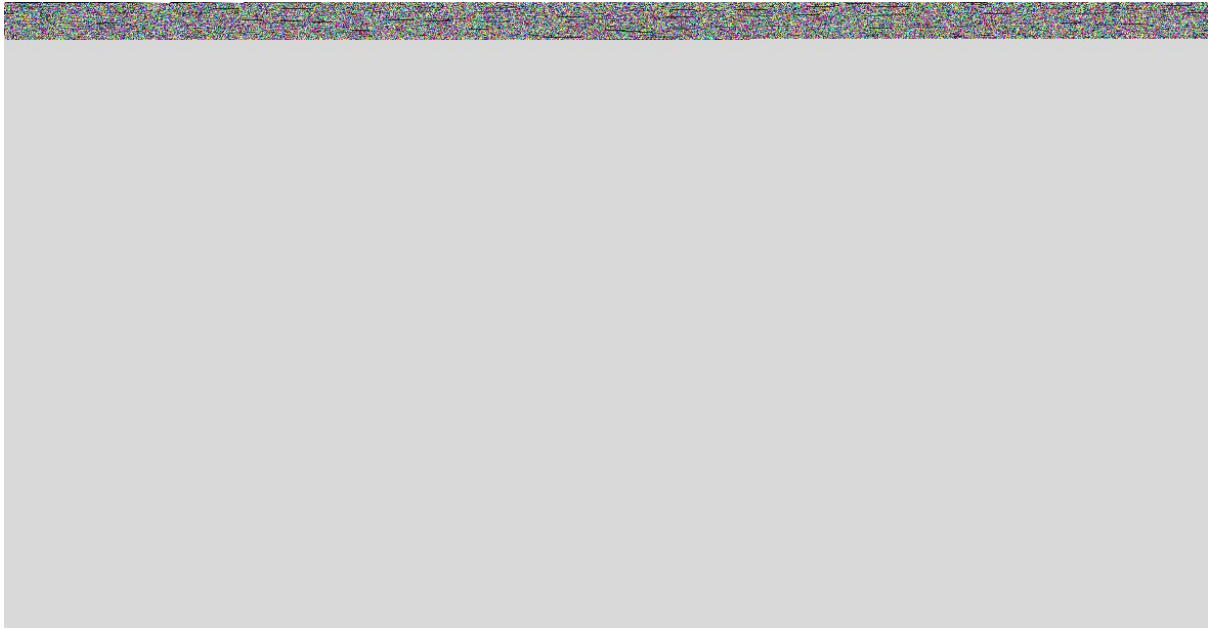

Supplement: c9nj06139h2.pdf [file c9nj06139h2.pdf]
