# Supplementary material for: New main-group ferrocenyldithiocarbamates and conversion to ferrocene oxazolidine-2-thione and -2-one
Source: Royal Society of Chemistry journal article supplement (doi:10.1039/c9nj06139h), 2020-01-01
Supplement: c9nj06139h1.pdf [file c9nj06139h1.pdf]

## **New main group ferrocenyldithiocarbamates and conversion to ferrocene oxazolidine-2-thione and -2-one**

Reena Yadav,<sup>a</sup> Suryabhan Singh,<sup>b</sup> Manoj Trivedi,<sup>c</sup> Gabriele Kociok-Köhn,<sup>d</sup> Nigam P. Rath,<sup>e</sup> Randolph D. Köhn,<sup>f\*</sup> Mohd. Muddassir,<sup>g</sup> and Abhinav Kumar<sup>a\*</sup>

- 
- <sup>a.</sup> *Department of Chemistry, University of Lucknow, Lucknow 226 007, India.  
Email: [abhinavmarshal@gmail.com](mailto:abhinavmarshal@gmail.com)*
- <sup>b.</sup> *Department of Chemistry, Guru Ghasidas Vishwadiyalaya, Bilaspur India*
- <sup>c.</sup> *Department of Chemistry, University of Delhi, Delhi 110 007, India.*
- <sup>d.</sup> *Material and Chemical Characterisation Facility (MC<sup>2</sup>), University of Bath, Bath BA2 7AY, UK*
- <sup>e.</sup> *Department of Chemistry & Biochemistry and Centre for Nanoscience, University of Missouri-St. Louis, One University Boulevard, St. Louis, MO 63121-4499, USA*
- <sup>f.</sup> *Department of Chemistry, University of Bath, Bath BA2 7AY, UK Email: [chsrdk@bath.ac.uk](mailto:chsrdk@bath.ac.uk)*

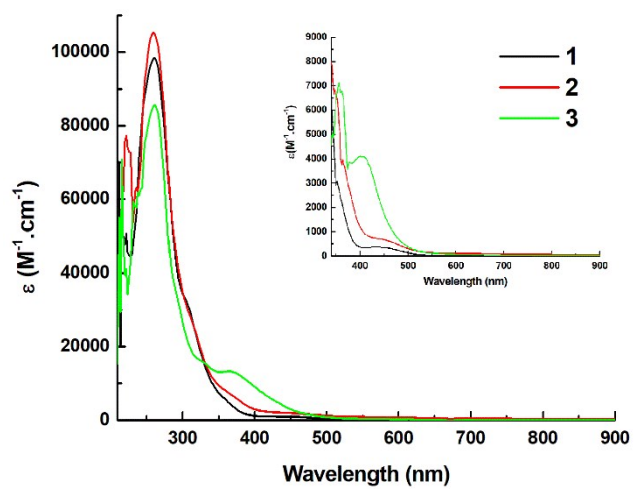

Fig. S1 Electronic absorption spectra for the complexes recorded in  $10^{-5}$  M dichloromethane solution (inset: spectra recorded in  $10^{-3}$  M solution).

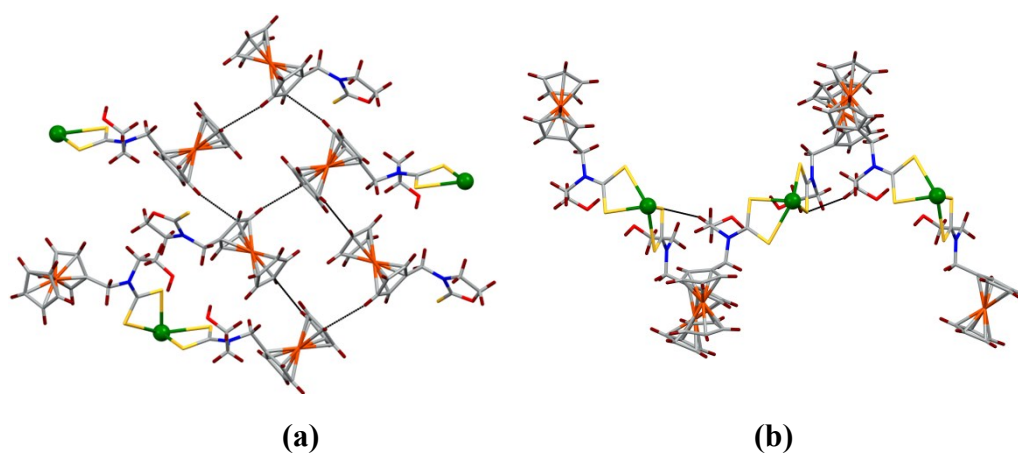

Fig. S2 (a) 2D sheet along b-axis due to  $CH \cdots \pi$  and (b) 1D chain due to  $CH_2 \cdots S$  interactions in **1**.

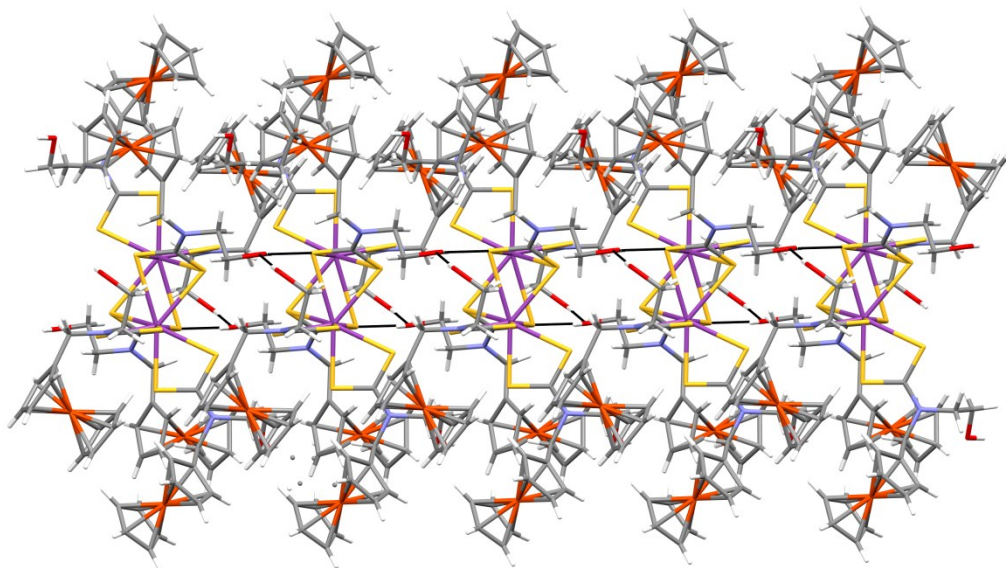

Figure S3. One dimensional chain formed due to intermolecular O-H $\cdots$ S interactions in **3**.

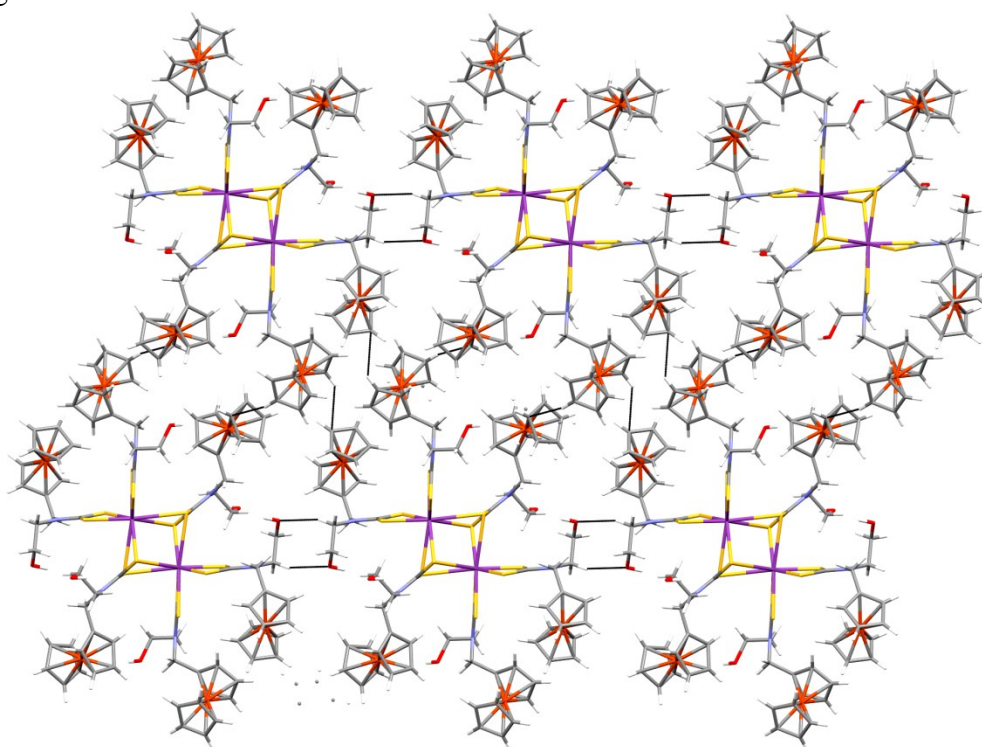

Figure S4 A 2D sheet formed due to CH $\cdots$  $\pi$  and CH<sub>2</sub> $\cdots$ O (OH group, 2.496 Å) interactions in **3**.

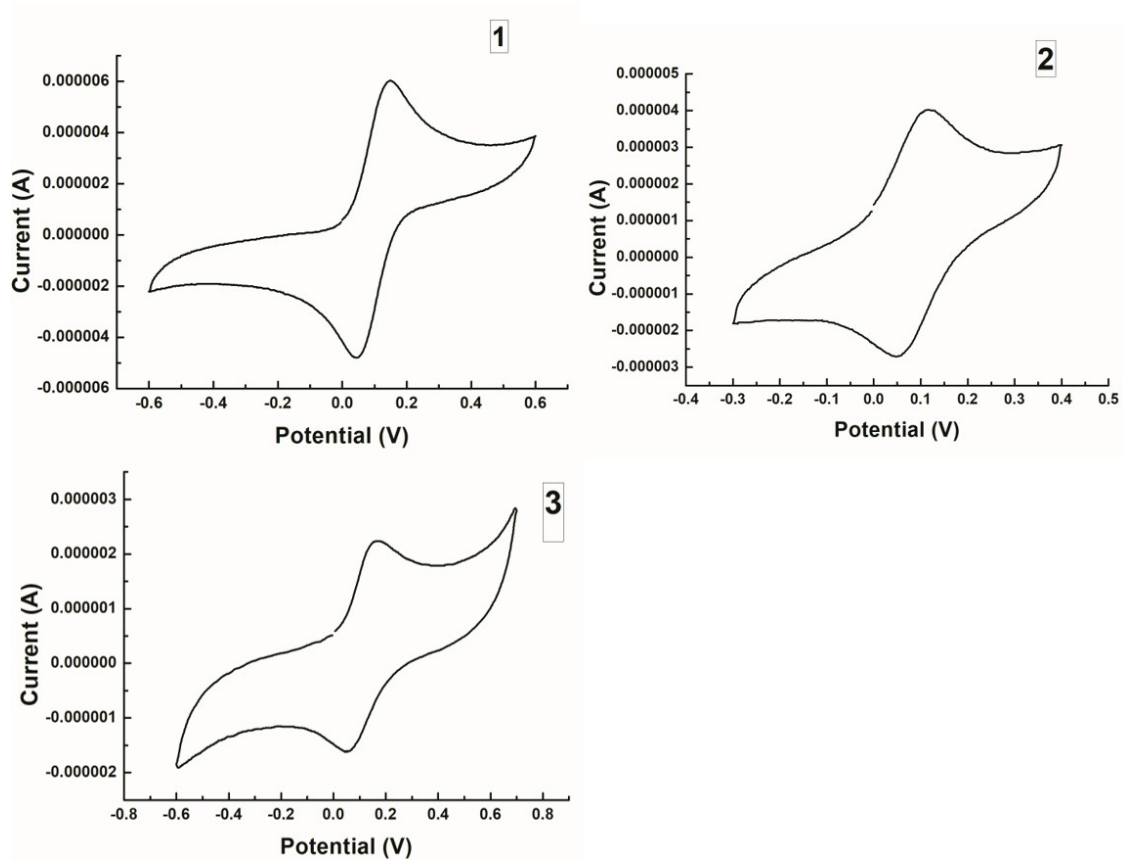

Fig. S5 The cyclic voltammograms for the complexes **1-3**.

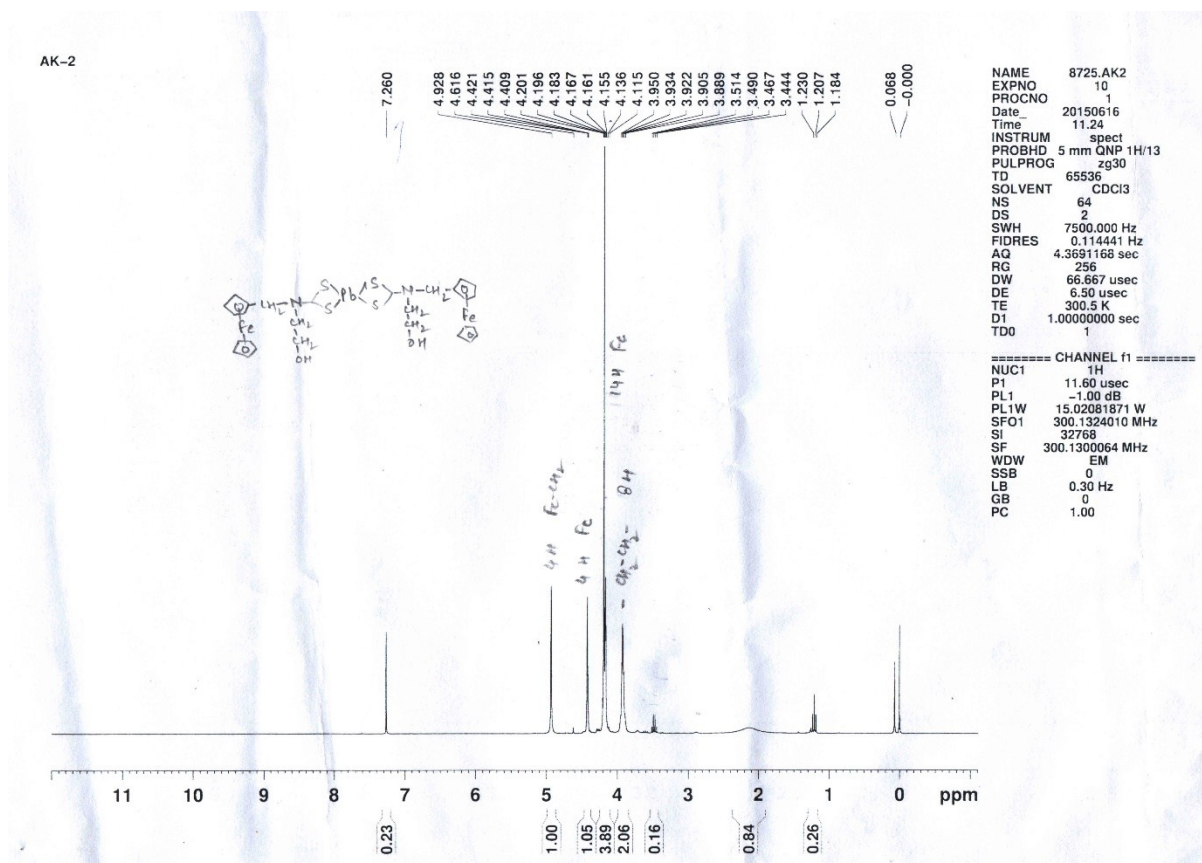

Fig. S6 <sup>1</sup>H NMR spectra for 1.

p-Ph

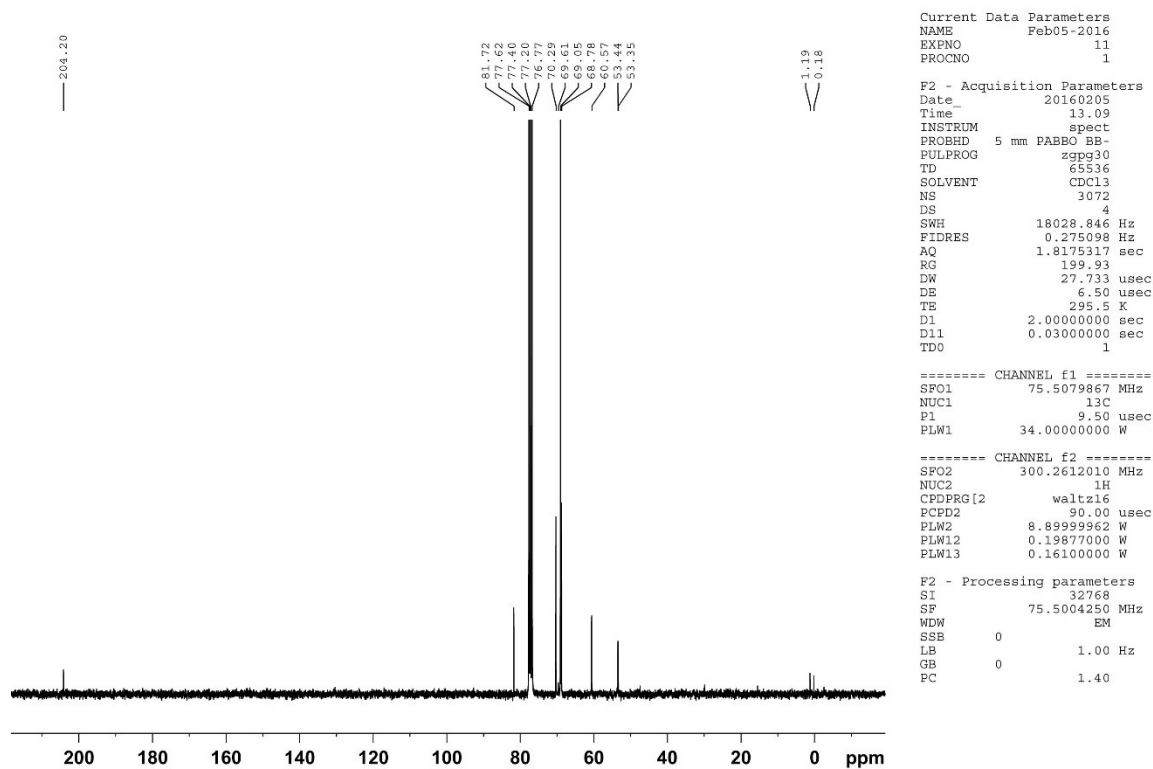

Fig. S7 <sup>13</sup>C NMR spectra for 1.



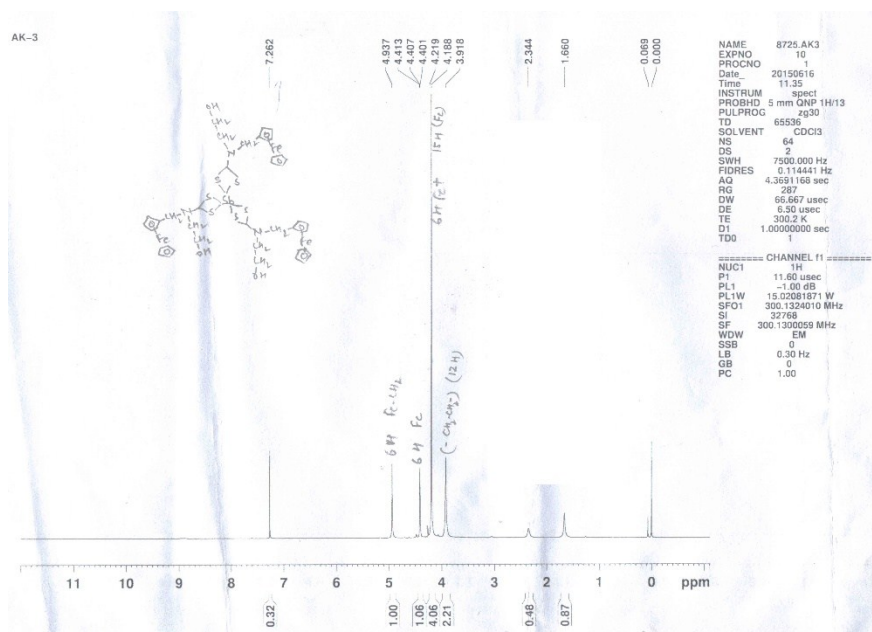

Fig. S8 <sup>1</sup>H NMR spectra for **2**.

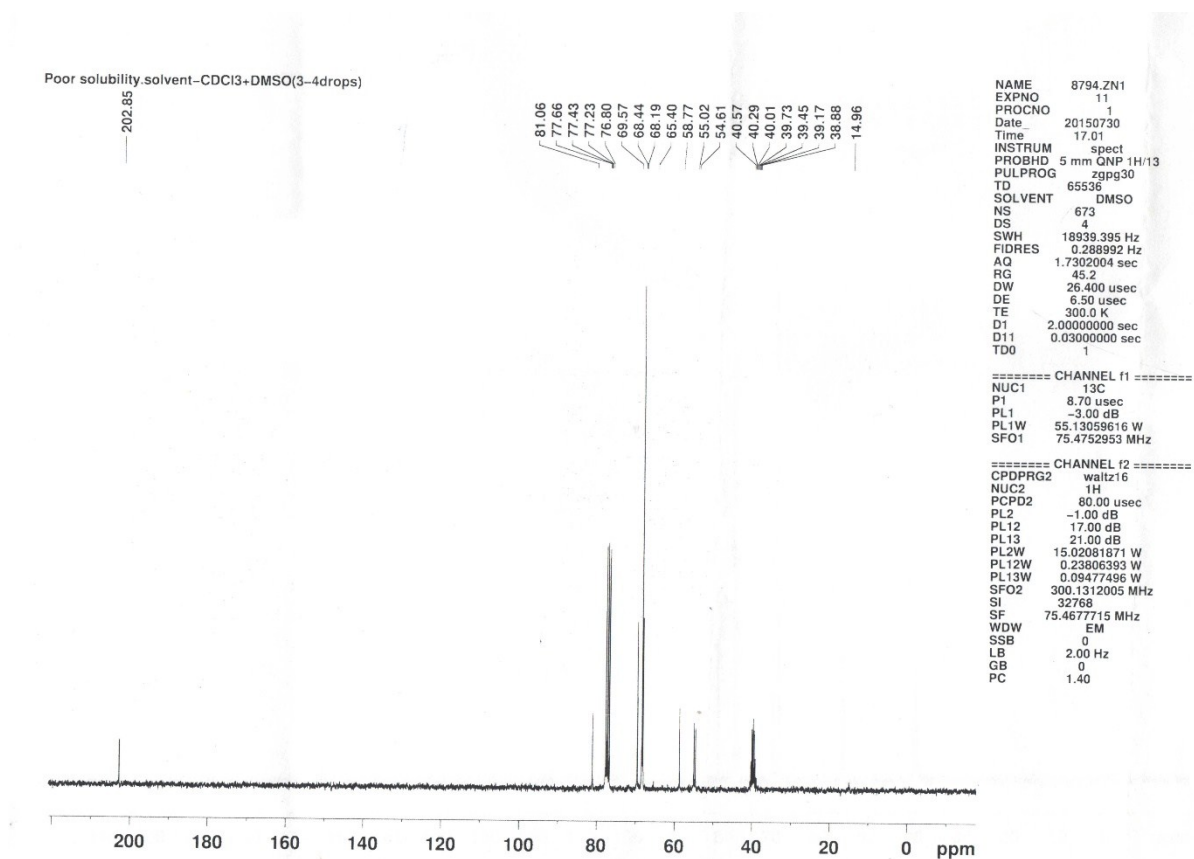

Fig. S9 <sup>13</sup>C NMR spectra for **2**.

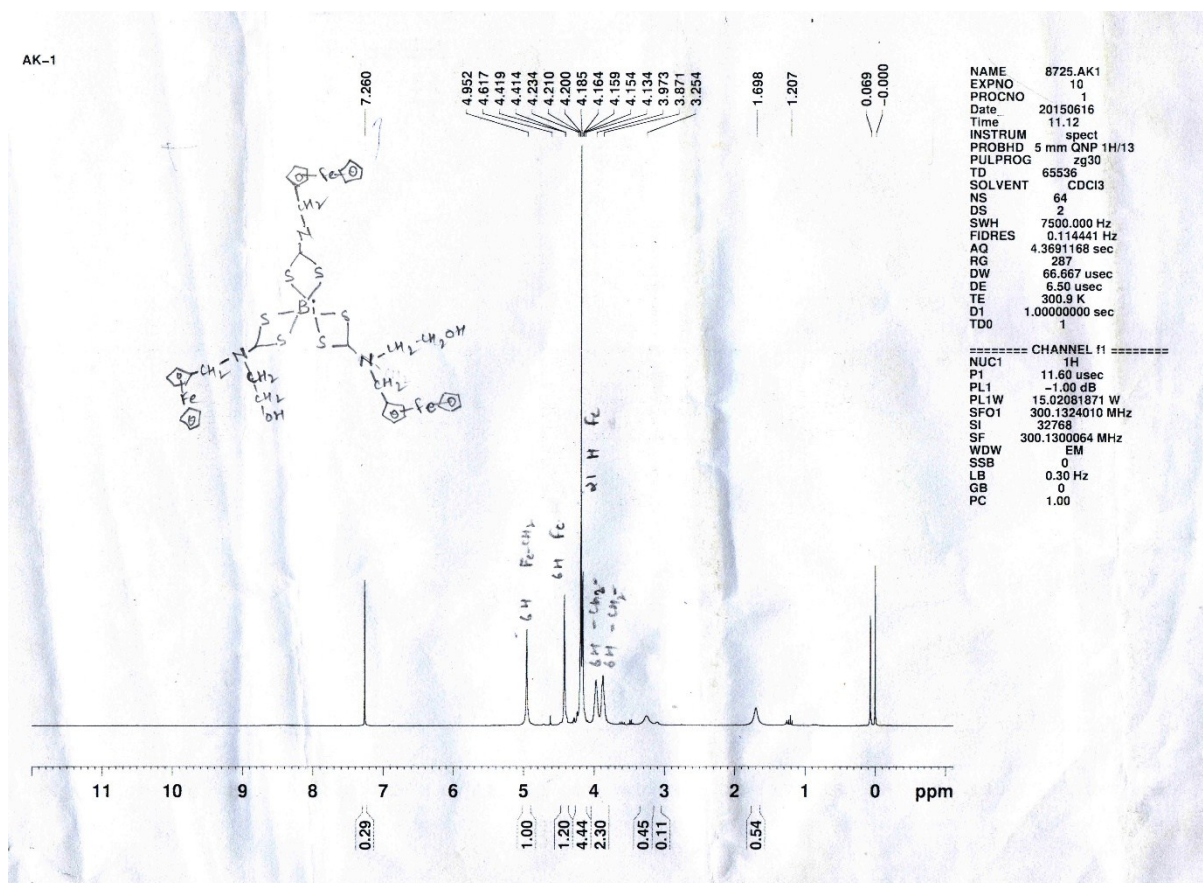

Fig. S10  $^1\text{H}$  NMR spectra for **3**.

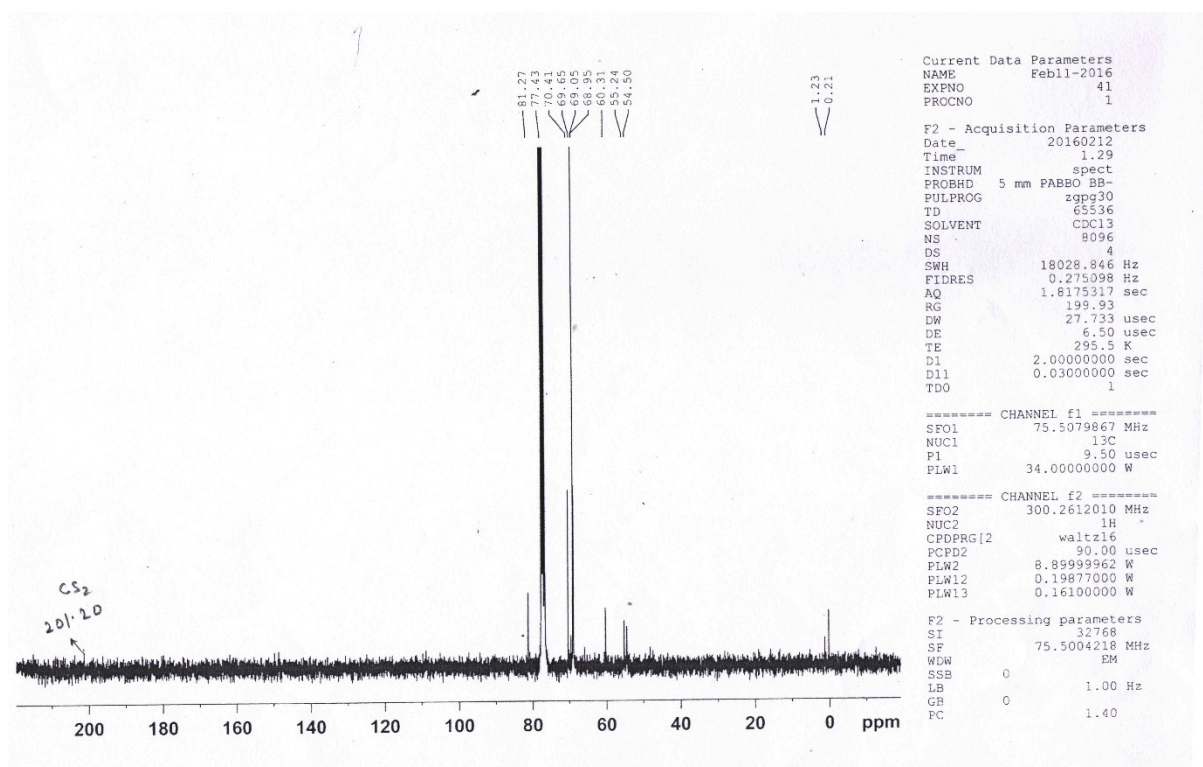

Fig. S11  $^{13}\text{C}$  NMR spectra for **3**.





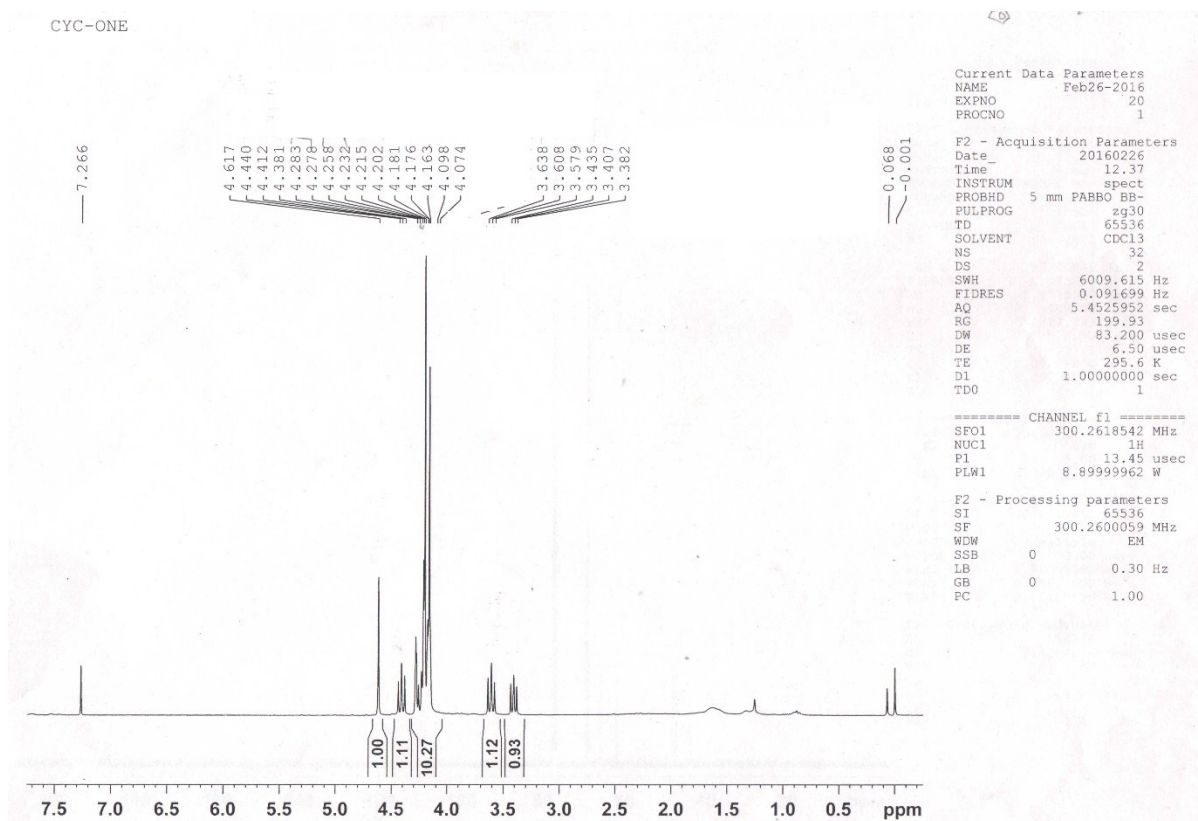

Fig. S14  $^1\text{H}$  NMR spectra for **5**.

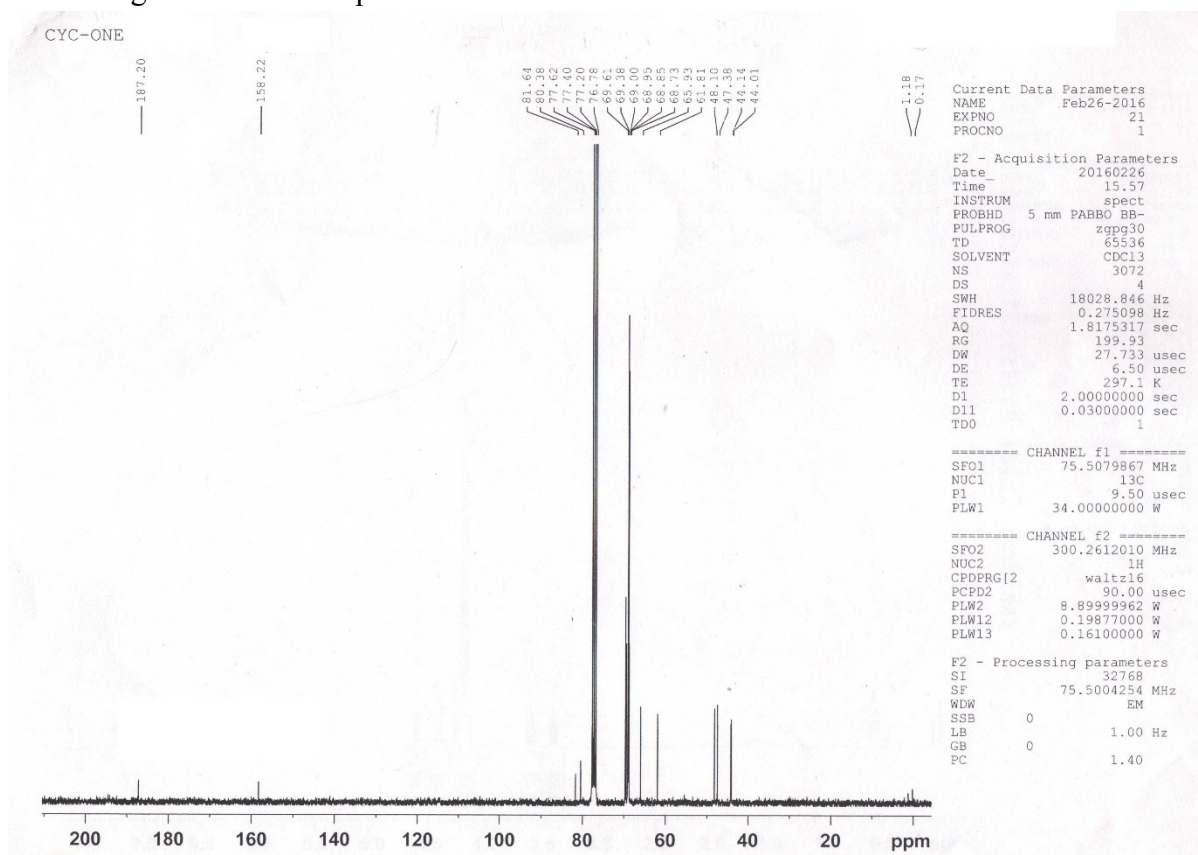

Fig. S15  $^{13}\text{C}$  NMR spectra for **5**.
